# Supplementary material
Source: publisher figshare collection journal article supplement (https://diabetesjournals.figshare.com/articles/dataset/_/12670325)
Supplement: Supplementary file 1 [file 1]

**Online supplemental material:**

Myocardial infarction does not accelerate atherosclerosis in a mouse model of type 1 diabetes

Farah Kramer<sup>1</sup>, Amy M Martinson<sup>2</sup>, Thalia Papayannopoulou<sup>3</sup>, and Jenny E Kanter<sup>1</sup>

<sup>1</sup> Division of Metabolism, Endocrinology and Nutrition, Departments of Medicine, University of Washington Medicine Diabetes Institute, University of Washington School of Medicine, Seattle, WA

<sup>2</sup> Departments and Pathology, University of Washington School of Medicine, Seattle, WA.

<sup>3</sup> Division of Hematology, Department of Medicine, University of Washington School of Medicine, Seattle, WA

**Supplemental table 1:Antibodies and key reagents**

| Antibody                                                 | Clone/product ID     | Manufacturer             | Dilution                   |
|----------------------------------------------------------|----------------------|--------------------------|----------------------------|
| CD45-FITC                                                | 30-F11               | eBioscience              | 1:500 (0.1 µg/100 µl)      |
| CD115-APC                                                | AFS98                | eBioscience              | 1:100 (0.2 µg/100 µl)      |
| GR1-PE-Cy7                                               | RB6-8C5              | eBioscience              | 1:1000 (0.05µg/100 µl)     |
| CD49D-PE (α4 integrin)                                   | PS/2                 | Southern Biotech         | 1:1000 (0.01 µg/100 µl)    |
| CD11B-PE                                                 | M1/70                | eBioscience              | 1:500 (0.1 µg/100 µl)      |
| F4/80-PE-Cy7                                             | BM8                  | eBioscience              | 1:200 (0.2 µg/100 µl)      |
| Viability dye e450                                       | NA                   | eBioscience              | 1:1000                     |
| Mac-2                                                    | CL8942AP             | Cedarlane                | 1 µg/ml                    |
| Fluoresbrite yellow green microspheres (latex particles) | 1715210              | Polysciences, Inc.       | 250 µl/mouse (diluted 1:4) |
| Alpha Smooth muscle actin                                | Ab5694               | Abcam                    | 0.2 µg/ml                  |
| IL1β                                                     | Ab9722               | Abcam                    | 1.25 µg/ml                 |
| TREM2                                                    | 50-172-8776 (Fisher) | Proteintech (via Fisher) | 3.7 µg/ml                  |

**Supplemental table 2: Primer sequences**

| Gene  | Forward primer             | Reverse primer          |
|-------|----------------------------|-------------------------|
| Rn18s | CATTAAATCAGTTATGGTTCCTTTGG | CCCGTCGGCATGTATTAGCT    |
| Ccl2  | TTAAAAACCTGGATCGGAACCAA    | GCATTAGCTTCAGATTTACGGGT |
| Il1b  | GGGCTGCTTCCAAACCTTTG       | TGATACTGCCTGCCTGAAGCTC  |
| Tnfa  | CCTGTAGCCACGTCGTAG         | GGGAGTAGACAAGGTACAACCC  |
| Il6   | TAGTCCTTCCTACCCCAATTTCC    | TTGGTCCTTAGCCACTCCTTC   |

**Supplemental table 3: Leukocyte counts**

| Study                                              | WBC<br>(x10 <sup>6</sup> /ml) | Monocytes<br>(x10 <sup>6</sup> /ml)<br>% | Neutrophils<br>(x10 <sup>6</sup> /ml)<br>% |
|----------------------------------------------------|-------------------------------|------------------------------------------|--------------------------------------------|
| <b>Sham vs MI, no BMT or prior fat feeding</b>     |                               |                                          |                                            |
| Sham, ND                                           | 5.8 ± 1.1 (3)                 | 0.48 ± 0.1 (3)<br>8.8 ± 2.0              | 0.69 ± 0.07 (3)<br>12.7 ± 2.3              |
| MI, ND                                             | 5.8 ± 0.5 (5)                 | 0.44 ± 0.04 (5)<br>7.5 ± 0.12            | 0.78 ± 0.13 (5)<br>13.2 ± 1.8              |
| Sham, D                                            | 7.4 ± 0.4 (4)                 | 0.39 ± 0.06 (4)<br>4.4 ± 0.38*           | 1.5 ± 0.3 (4)<br>20.7 ± 4.9                |
| MI, D                                              | 4.6 ± 0.5 (6) <sup>#</sup>    | 0.24 ± 0.03 (6)*<br>4.9 ± 0.56*          | 1.3 ± 0.12 (5)<br>30.1 ± 3.1*              |
| <b>Female (12 week HF+4 week diabetes), no BMT</b> |                               |                                          |                                            |
| ND, female                                         | 6.2 ± 0.3 (13)                | 0.51 ± 0.07 (13)<br>8.1 ± 0.7            | 0.83 ± 0.08 (13)<br>13.6 ± 1.0             |
| D, female                                          | 5.4 ± 0.5 (14)                | 0.36 ± 0.03 (14)<br>6.6 ± 0.5            | 1.22 ± 0.14 (14)<br>22.5 ± 1.5*            |
| ND, male                                           | 6.7 ± 0.5 (12)                | 0.44 ± 0.04 (12)<br>6.5 ± 0.3            | 0.76 ± 0.3 (12)<br>11.4 ± 0.9              |
| D, male                                            | 5.0 ± 0.5 (12)                | 0.32 ± 0.03 (12)<br>6.8 ± 0.2            | 1.18 ± 0.16 (12)<br>25.0 ± 2.2*            |
| <b>Female (LCMV control), no BMT</b>               |                               |                                          |                                            |
| ND, saline<br>(blood glucose 7.8 mM)               | 4.6 ± 0.3 (5)                 | 0.36 ± 0.05 (5)<br>7.8 ± 1.0             | 0.70 ± 0.05 (5)<br>16.3 ± 1.6              |
| ND, LCMV<br>(blood glucose 8.2 mM)                 | 7.3 ± 0.7 (5)                 | 0.36 ± 0.05 (5)<br>5.0 ± 0.4*            | 0.66 ± 0.08 (5)<br>9.0 ± 0.6*              |

\*statistically significant (p<0.05) compared to ND (sham or saline), # statistically significant (p<0.05) compared to D (sham) (or opposite gender if applicable).

**Figure S1. Gating for blood monocytes/Ly6C<sup>hi</sup> monocytes/Ly6C<sup>low</sup> monocytes, labeled monocytes and neutrophils.** **A.** Blood cells were gated as shown. **B.** Example of monocytes and neutrophils on a pseudocolor plot.

**Figure S2. Diabetes suppresses levels of white blood cells.** **A.** Lymphocyte cell count at 3 weeks after induction of diabetes measured using a Hemavet® veterinary hematology system. **B.** Neutrophil count at 3 weeks using a Hemavet® veterinary hematology system. **C.** Total monocyte counts normalizing the data from the flow cytometry to total white blood cells counts. **D.** Spleen weights. N=12-19 (A-C) and N=9-12 (D). \*p<0.05, \*\*p<0.01, \*\*\*p<0.001 three-way ANOVA (WT vs KO, ND vs D, Sham vs MI as the parameters, or the interaction between these) and followed by Sidak's multiple comparison tests comparing groups that differ by one parameter (as indicated by lines with asterisks).

**Figure S3. Neutrophil, Ly6C<sup>hi</sup> and Ly6C<sup>low</sup> monocyte integrin  $\alpha 4$  expression.** **A.** Flow cytometric analysis of blood neutrophil integrin  $\alpha 4$  expression at 7 days and at 3 weeks. **B.** Ly6C<sup>hi</sup> monocyte integrin  $\alpha 4$  expression at 7 days and at 3 weeks. **C.** Ly6C<sup>lo</sup> monocyte integrin  $\alpha 4$  expression at 7 days and at 3 weeks. N=14-22. \*p<0.05, \*\*p<0.01, \*\*\*p<0.001 three-way ANOVA (WT vs KO, ND vs D, Sham vs MI as the parameters, or the interaction between these) and followed by Sidak's multiple comparison tests comparing groups that differ by one parameter (as indicated by lines with asterisks). The differences between each WT and KO group are not indicated with lines in A (all \*\*).

**Figure S4. Neither diabetes nor MI alter lesion size.** **A.** Representative images of aortic atherosclerosis stained *en face* with the lipophilic stain Sudan IV. **B.** Representative pictures of brachiocephalic artery (BCA) lesions stained with Movat's pentachrome stain. Arrows indicate necrotic cores. **C.** BCA lesion quantification. Data analyzed by three-way ANOVA (WT vs KO, ND vs D, Sham vs MI as the parameters, or the interaction between these) followed by Sidak's multiple comparison tests comparing groups that differ by one parameter. No statistical significance detected.

**Figure S5. Integrin  $\alpha 4$ -deficient reduces monocyte recruitment.** **A.** Monocytes were isolated from myeloid cell-selective (driven by LysM) deletion of integrin  $\alpha 4$  and (KO; integrin  $\alpha 4^{MC/-}$ ) bone marrow from the mice in the main study and allowed to adhere to unstimulated or TNF $\alpha$ -activated (20 ng/ml) mouse endothelium. N=11-12. **B.** Number and percentage of monocytes labeled with yellow-green (YG) latex beads, respectively. **C** LyC<sup>hi</sup> and LyC<sup>lo</sup> monocytes labeled with yellow-green (YG) latex beads, respectively, expressed as % of the population. **D.** YG-monocyte recruitment to the brachiocephalic artery (BCA) normalized to monocyte labeling efficiency. **E.** Mac-2 and alpha-smooth muscle ( $\alpha$ -SM) actin immunohistochemistry with negative controls, rat IgG and rabbit IgG, respectively. **F.** Sinus  $\alpha$ -SM, expressed as % of lesion. **G.** Picrosirius red staining, expressed as % of lesion. \*p<0.05, \*\*p<0.01, \*\*\*p<0.001 three-way ANOVA (WT vs KO, ND vs D, Sham vs MI as the parameters, or the interaction between these) followed by Sidak's multiple comparison tests comparing groups that differ by one parameter (as indicated by lines with asterisks).

**Figure S6. Diabetes increases macrophage cell death.** LCMV (lymphocytic choriomeningitis virus) was used to induce diabetes (D), or saline (non-diabetic; ND), in female *Ldlr*<sup>-/-</sup>; *Gp*<sup>Tg</sup> mice. 2 weeks post LCMV injection mice were subjected to permanent ligation of the left anterior descending coronary artery (experimental MI) or a sham surgery and maintained for an additional 3.5 weeks. Mice were maintained on a low-fat semipurified diet from the onset of diabetes. Thioglycolate-elicited macrophages were isolated 4 days after thioglycolate administration (n=3-6). **A.** Total cellular cholesterol. **B.** Cholesteryl esters. **C.** Viability dye-positive (dead) within the macrophage population (F4/80 and CD11B-positive) in the thioglycolate-elicited cells. **D.** Viability dye-positive (dead) within the splenic macrophage population (F4/80 and CD11B-positive). \*p<0.05, \*\*p<0.01, \*\*\*p<0.001, two-way ANOVA followed by Tukey's multiple comparison tests, indicated by lines with asterisks.

**Figure S7. Diabetes increases necrotic core size.** **A.** Examples of necrotic cores in aortic sinus (top) and brachiocephalic artery (BCA; bottom) with necrotic cores traced with black dashed lines. **B.** Aortic sinus necrotic cores expressed as  $\mu\text{m}^2$ . **C.** BCA necrotic cores expressed as  $\mu\text{m}^2$ . N=14-21, \*p<0.05, \*\*p<0.01, \*\*\*p<0.001 three-way ANOVA (WT vs KO, ND vs D, Sham vs MI as the parameters, or the interaction between these) and followed by Sidak's multiple comparison tests comparing groups that differ by one parameter (as indicated by lines with asterisks).

**Figure S8. Macrophage gating strategy.** Gating strategy for identifying viability dye-positive (dead) resident peritoneal macrophages within the macrophage population (F4/80 and CD11B-positive).
